# Supplementary material
Source: PubMed Central journal article supplement (PMC2766415)
Supplement: NIHMS92122-supplement-01.pdf [file NIHMS92122-supplement-01.pdf]

## Supplemental Data

### Temporal and Spatial Control

#### of Germ-Plasm RNAs

Prashanth Rangan, Matthew DeGennaro, Kean Jaime-Bustamante, Rémi- Xavier Coux, Rui G. Martinho, and Ruth Lehmann

#### Supplemental Experimental Procedures

##### Transgene construction

The reporter constructs were generated by cloning the 3'UTRs of various RNAs mentioned in Table 1 into p{CaSpeR-2} which carries the *nos* promoter and 5' UTR to produce germline specific expression as previously described in [1]. eGFP was cloned into this vector between the SpeI site and XhoI sites. An additional HA tag was introduced on the Carboxy terminal end of GFP. The sequences of the relevant 3'UTRs were obtained from FlyBase and were amplified using primers that introduced stop codons before the start of the 3'UTR. The 3' UTR fragments were then cloned into the above vector that contained the *nos* promoter, 5' UTR and HA-GFP by replacing the *K10* 3'UTR between XhoI and KpnI sites.

##### Fly stocks

The following stocks (described in FlyBase) were used in this study: *osk*<sup>54</sup>, *osk*<sup>346</sup>, *orb*<sup>mel</sup>, *orb*<sup>343</sup>, *osk-bcd* 3'UTR and *Oregon R* (Bloomington Drosophila Stock Center and Lehmann Lab). Flies were raised using standard corn meal-molasses medium at 25°C.

**Embryos collection and fixation**

Flies of indicated genotypes were allowed to lay for 0-2 hrs or overnight and embryos were collected, dechorionated in 50% bleach for 10 minutes, fixed in a 80% heptane, 17.5% PBS and 2.5% formaldehyde solution for 30 minutes and stored in methanol at -20° C [1, 2].

***In situ* hybridizations**

Digoxigenin (DIG) labeled RNA probe for GFP and LacZ were generated using *in vitro* run-off transcription using modified nucleotides (DIG-UTP) (Roche). *In situ* hybridization was carried out as previously described with the exception that the probes for GFP and LacZ were not carbonate treated [1, 2].

**Immunostaining**

Immunostainings of embryos were performed using standard procedures as described in [1, 2]. The following primary antibodies and dilutions were used: Rabbit  $\alpha$ -VASA (1:5000) (Lehmann lab), Rat  $\alpha$ -HA (1:1000) (Roche), Rabbit  $\alpha$ -SLAM (1:1000) (Lehmann lab), mouse  $\alpha$ -P-Ser2 (1:500) (Covance). For detecting ORB in the germ plasm and germ cells  $\alpha$ -ORB antibody was used at a dilution of 1:500 instead of 1:1000. Cy2, Cy3 or Cy5 conjugated to appropriate secondary antibodies were used at a 1:500 dilution (Invitrogen).

**Fluorescent imaging**

Immunostainings and FISH were visualized using Zeiss LSM-510 Meta confocal microscope using 10x, 20x, oil-immersed 40x. The anterior of a stage 1 embryo was used

to correct for background.

### **PAT assays**

RACE-PAT assays were performed as described in [3] and the products were run on an 8% urea denaturing gel. 5'GCGAGCTCGGCGCCCGCGTTTTTTTTTTTTT 3' was used as an anchored dT primer for first strand synthesis. 5'TTGCTTTCGTGAAAACCTCGCATTGT3' was used for *pgc* 3'UTR. Dried gels were exposed to Molecular Dynamics PhosphorImager screens and quantified with Image J software.

cRT-PCR for *bruno* was carried out as described in [4, 5]. 4 ug of total RNA was decapped and circularized and RT was carried out using the primer 5' CATGGAAGAGTGACGCGGTACGGCCG3', and was amplified using 5' CATGGAAGAGTGACGCGGTACGGCCG3' and 5' GGTCCTGAAATATGTAAATAATATCCGC3'. The products were run on a 5 % agarose gel (MetaPhor, FMC Bioproducts).

### **Western blots**

Western blots were performed following standard procedures [1]. 40 µg of protein from stage 1-2 embryo extract was loaded on the gel to detect ORB. Rabbit α-ORB primary antibody was used at a dilution of 1/1000.

### **Fluorescent *in situ* hybridizations**

Digoxigenin labeled RNA probes were generated using *in vitro* run off transcription using modified nucleotides (DIG-UTP) (Roche). Single RNA Fluorescent *in situ*

## Current Biology, Volume 19

hybridizations were visualized with Tyramide Signal Amplification (TSA) (Invitrogen, Molecular Probes) as previously described with the exception of the PBS washes which were carried out in PBS + 0.2% Tween 20 to prevent aggregation of embryos [2].

### RNA-Protein Double labeling

Primary detection reagents, biotin-conjugated  $\alpha$ -DIG and  $\alpha$ -GFP, were incubated simultaneously for 2 hours. This was followed by an incubation with fluorescent secondary antibody with streptavidin-HRP. Lastly DAPI staining and the TSA reaction were performed as described in Lécuyer *et al.* [2]. Non-cross-reactive antibodies were used. All embryos are oriented posterior to the right.

### References

1. Arkov, A.L., Wang, J.Y., Ramos, A., and Lehmann, R. (2006). The role of Tudor domains in germline development and polar granule architecture. *Development* *133*, 4053-4062.
2. Lecuyer, E., Parthasarathy, N., and Krause, H.M. (2008). Fluorescent in situ hybridization protocols in *Drosophila* embryos and tissues. *Methods Mol Biol* *420*, 289-302.
3. Salles, F.J., Richards, W.G., and Strickland, S. (1999). Assaying the polyadenylation state of mRNAs. *Methods* *17*, 38-45.
4. Couttet, P., Fromont-Racine, M., Steel, D., Pictet, R., and Grange, T. (1997). Messenger RNA deadenylation precedes decapping in mammalian cells. *Proc Natl Acad Sci U S A* *94*, 5628-5633.
5. Suh, N., Jedamzik, B., Eckmann, C.R., Wickens, M., and Kimble, J. (2006). The GLD-2 poly(A) polymerase activates *gld-1* mRNA in the *Caenorhabditis elegans* germ line. *Proc Natl Acad Sci U S A* *103*, 15108-15112.
6. Lantz, V., and Schedl, P. (1994). Multiple cis-acting targeting sequences are required for *orb* mRNA localization during *Drosophila* oogenesis. *Mol Cell Biol* *14*, 2235-2242.
7. Hanyu-Nakamura, K., Sonobe-Nojima, H., Tanigawa, A., Lasko, P., and Nakamura, A. (2008). *Drosophila* Pgc protein inhibits P-TEFb recruitment to chromatin in primordial germ cells. *Nature* *451*, 730-733.
8. Jones, J.R., and Macdonald, P.M. (2007). Oskar controls morphology of polar granules and nuclear bodies in *Drosophila*. *Development* *134*, 233-236.
9. Lecuyer, E., Yoshida, H., Parthasarathy, N., Alm, C., Babak, T., Cerovina, T., Hughes, T.R., Tomancak, P., and Krause, H.M. (2007). Global analysis of mRNA

- localization reveals a prominent role in organizing cellular architecture and function. *Cell* 131, 174-187.
10. Tomancak, P., Berman, B.P., Beaton, A., Weiszmann, R., Kwan, E., Hartenstein, V., Celniker, S.E., and Rubin, G.M. (2007). Global analysis of patterns of gene expression during *Drosophila* embryogenesis. *Genome Biol* 8, R145.

A

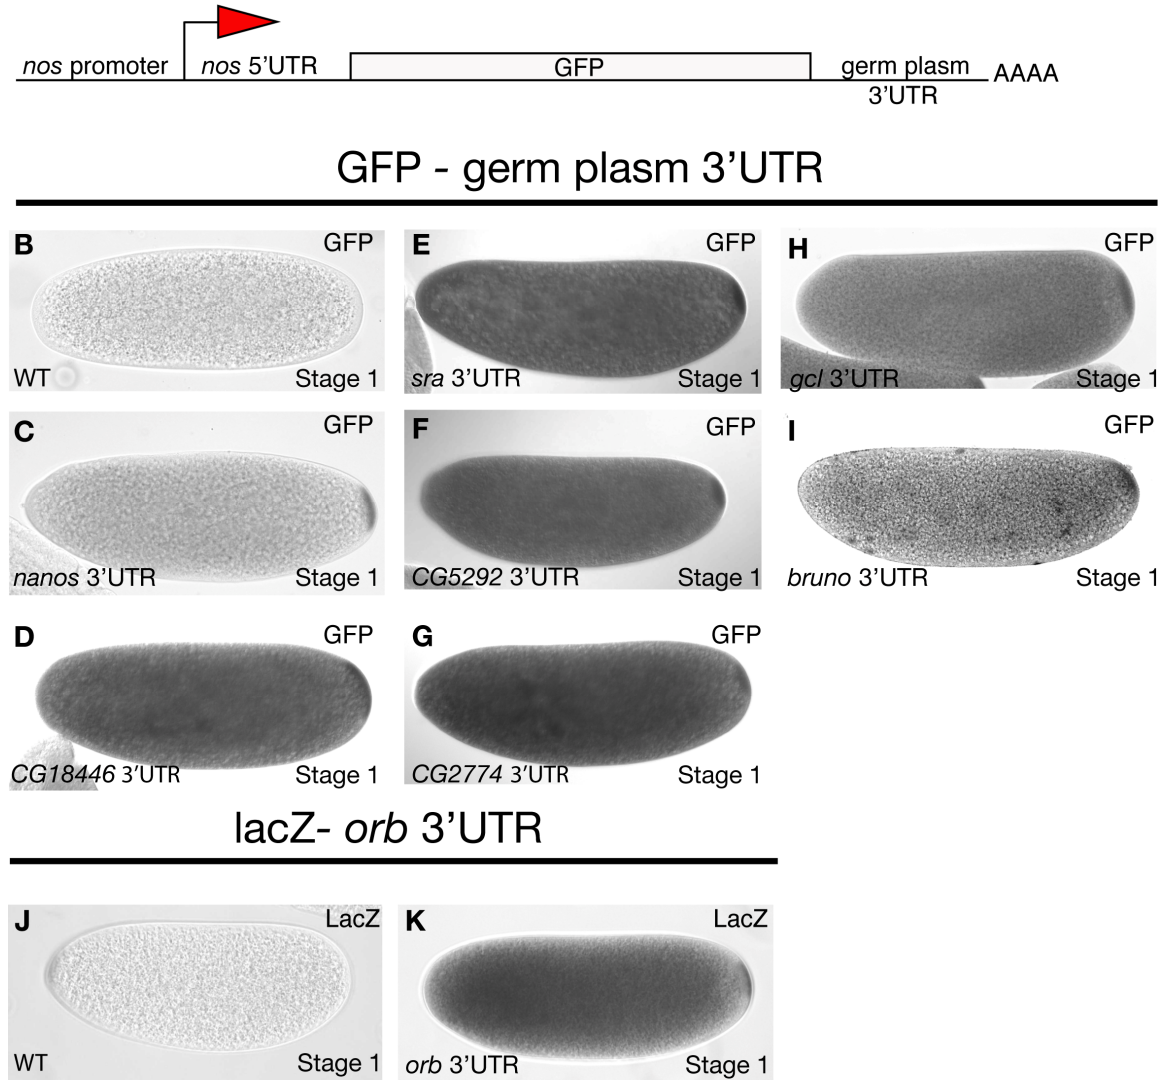

**Figure S1: RNA Localization to germ plasm is 3'UTR dependent.**

**A.** Diagram showing the *pnos::HA-GFP-HA-germ plasm 3'UTR* construct used in this study. **B-I.** *In situ* hybridization with GFP RNA probe to stage 1 embryos from mothers carrying the *pnos::HA-GFP-HA-germ plasm 3'UTR* as indicated. For *nanos 3'UTR* (C) GFP was fused to moesin instead of HA. **J-K.** *In situ* hybridization with *lacZ* RNA in embryos from mothers carrying a *phsp83::LacZ-orb 3'UTR* transgene [6]. All embryos are oriented posterior to the right.

HA-GFP-HA *pgc* 3'UTR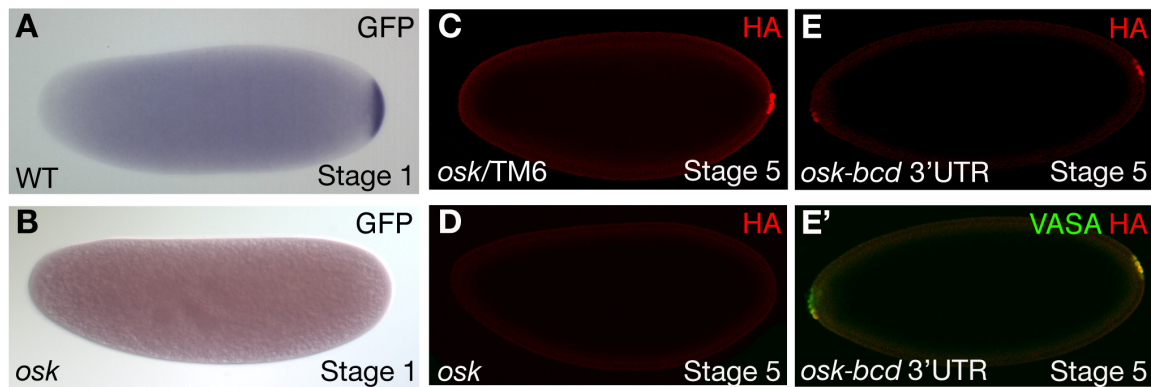

**Figure S2: Localization of *pgc* 3'UTR reporter is *osk* dependent.**

**A and B.** *In situ* hybridization with GFP RNA probe in embryos from wild-type (**A**) and *oskar* mutant (**B**) females carrying the *pnos::HA-GFP-HA-pgc* 3'UTR transgene. **C and D.** Expression of GFP-HA in embryos from wild-type (**C**) and *oskar* mutant (**D**) females carrying the *pnos::HA-GFP-HA-pgc* 3'UTR transgene stained with HA antibody. **E and E'.** Expression of GFP-HA in embryos from females carrying *osk-bcd* 3'UTR and *pnos::HA-GFP-HA-pgc* 3'UTR transgenes monitored by HA staining for GFP expression (**E**) and VASA (**E'**) to mark germ cells. HA under control of the *pgc* 3'UTR is expressed in both normal posterior and ectopic anterior germ cells. All embryos are oriented posterior to the right.

*nanos* 3'UTR

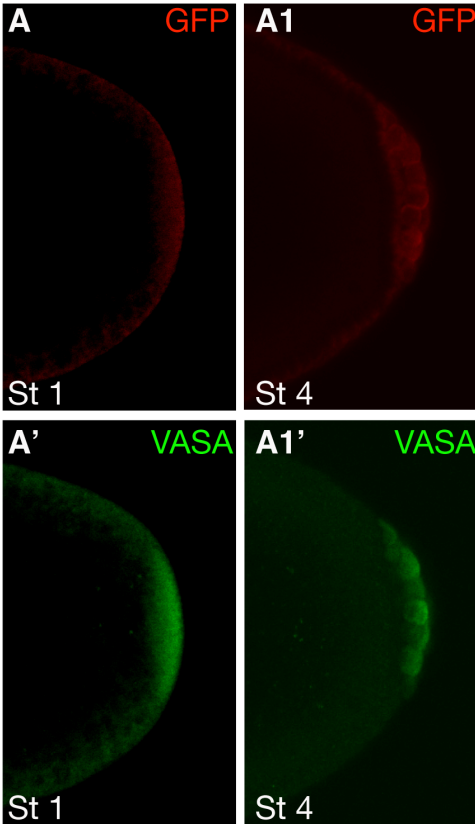

**Figure S3: Class I localized RNAs, *nanos* and *orb*, are translated from germ plasm stage onwards.**

**A.** Timing of Moesin-GFP expression fused to *nanos* 3'UTRs monitored by antibody staining against GFP. GFP (red) is expressed in germ plasm (stage 1, A) marked by VASA antibody (green) (A') and continues to be expressed in germ cells (stage 5, A1) marked by VASA antibody (A1'). **B.** Timing of LacZ expression fused to *orb* 3'UTR. LacZ (red) is expressed in germ plasm (stage 1, B) marked by VASA antibody (green) (B') and continues to be expressed in germ cells (stage 5, B1) marked by VASA antibody (B1'). Endogenous antibody staining for ORB is shown in Supplementary Figure 10. All embryos are oriented posterior to the right.

*orb* 3'UTR

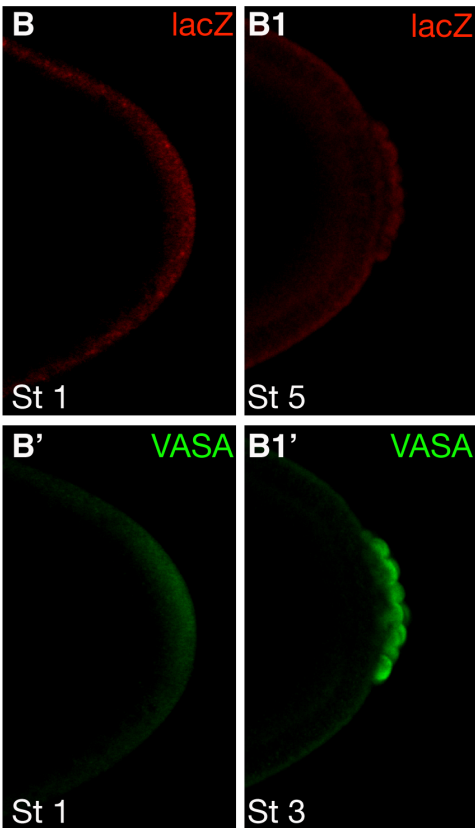

*gcl* 3'UTR

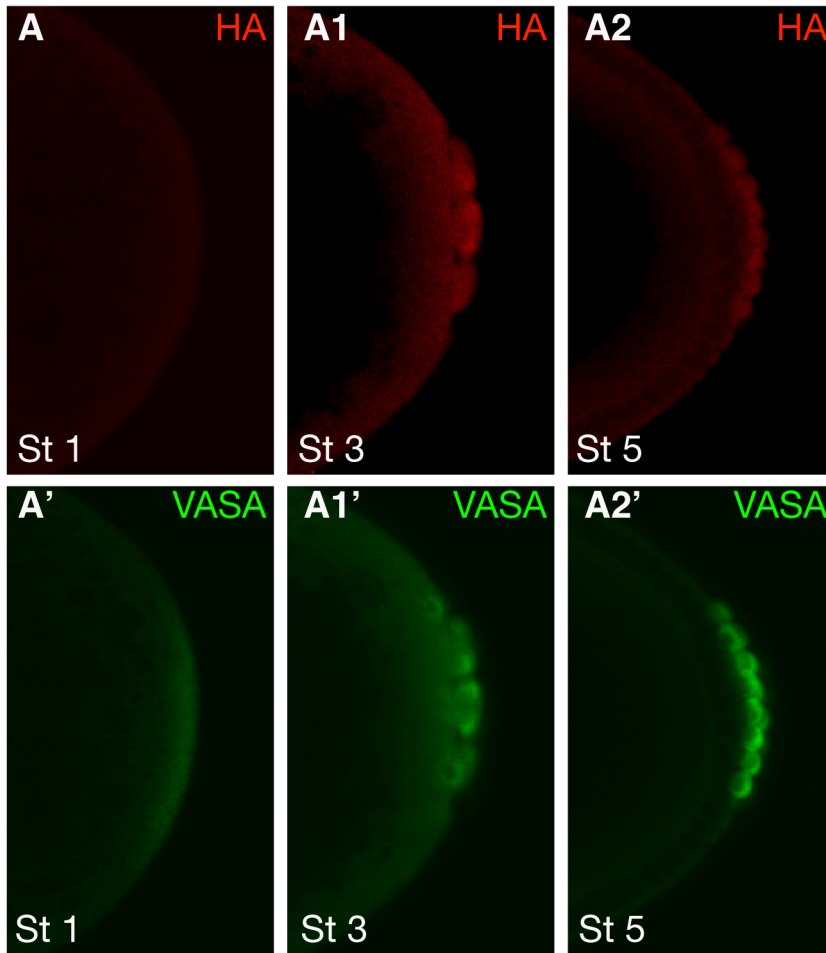

**Figure S4: Class II localized RNA, *gcl*, is translated from germ bud onwards.** Timing of expression of GFP-HA fused to *gcl* 3'UTR monitored by antibody staining against HA. VASA in green marks germ plasm (stage 1, A'), germ buds (stage 3, A1') and germ cells (stage 4, A2'). HA staining (A-A2) is observed from germ bud stage onwards. All embryos are oriented posterior to the right.



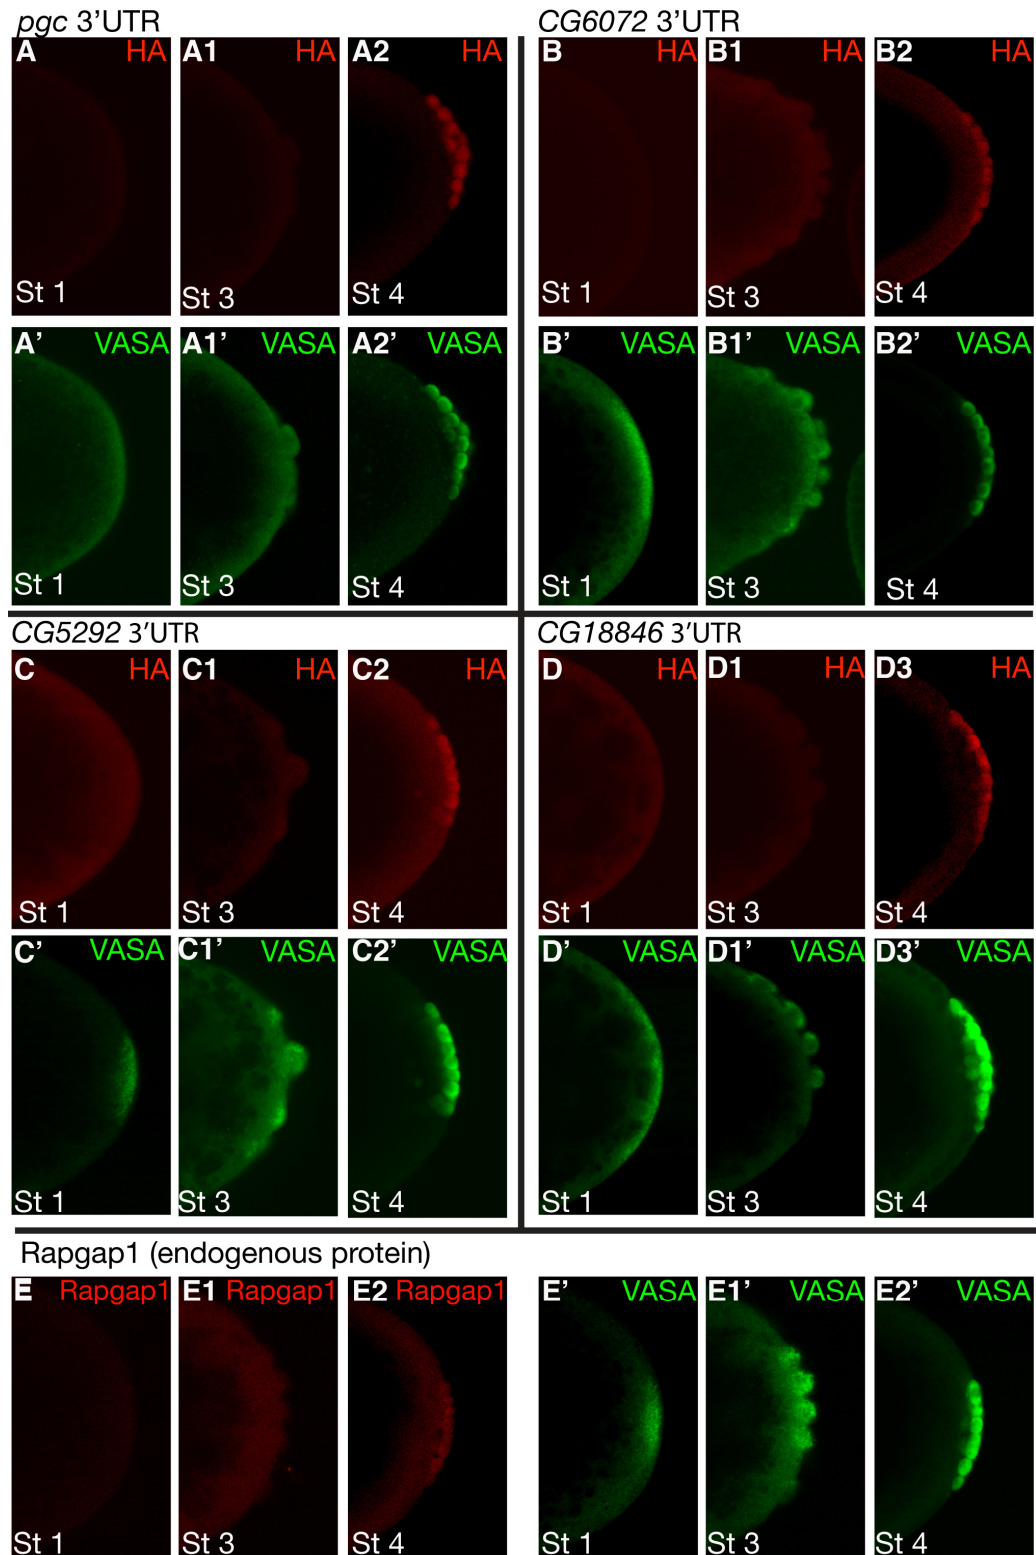

**Figure S5: Class III localized RNAs, *pgc*, *CG6072*, *CG5292*, *CG18846* and *rapgap1*, are translated only in germ cells.**

**A-D.** Timing of expression of GFP-HA fused to indicated 3'UTRs monitored by antibody staining against HA. **A-A2.** *pgc* 3'UTR. **B-B2.** *CG6072* 3'UTR. **C-C2.** *CG5292*

**Current Biology, Volume 19**

3'UTR **D-D3**. *CG18846* 3'UTR. The 3'UTRs are indicated on top of each panel. HA staining is in red and VASA in green. **E-E2**. Staining for endogenous protein Rappap1. All RNAs in this class are translated as germ cells form. All embryos are oriented posterior to the right.

CG2774 3'UTR

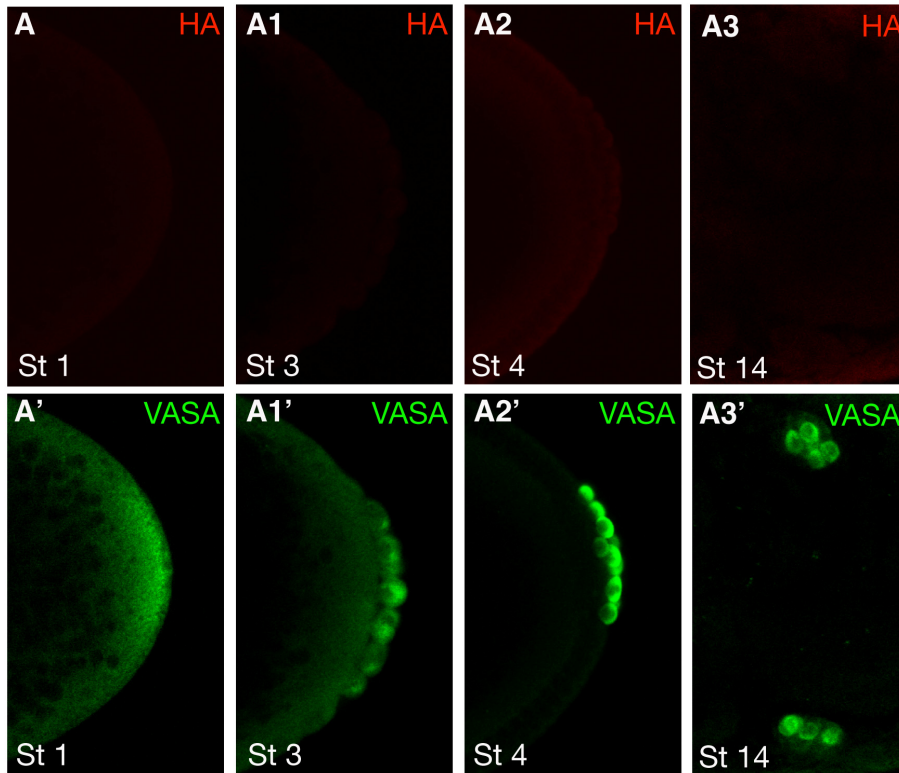

*bru* 3'UTR

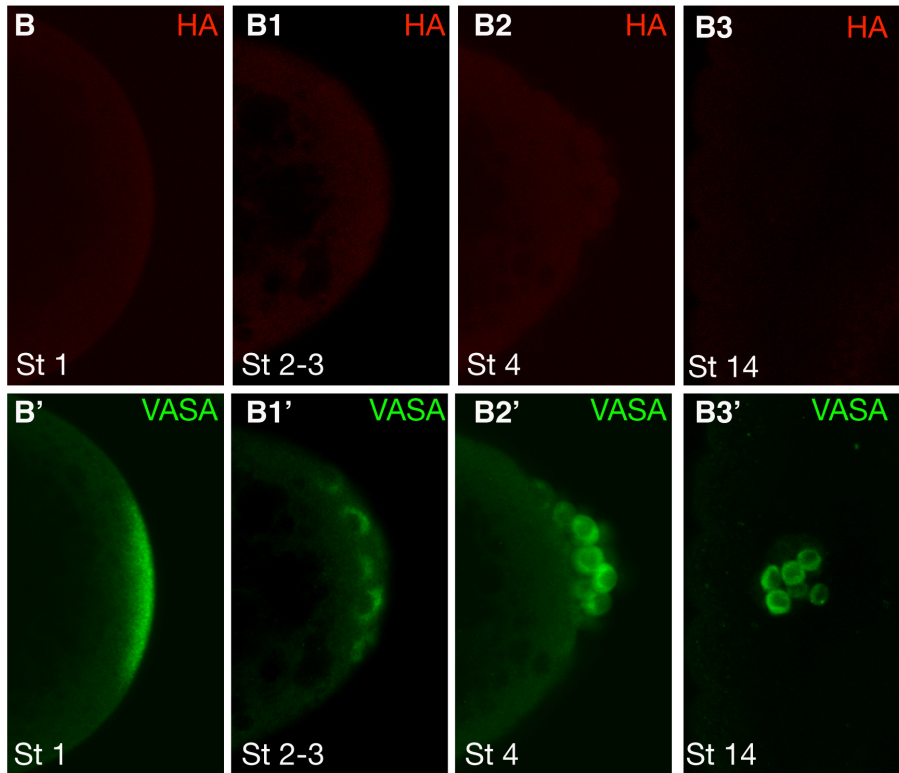

Figure S6: Class IV RNAs, *bruno* and *CG2774*, are not translated in the early embryo.

**A-A3.** Expression of GFP-HA fused to *bruno* 3'UTRs monitored by antibody staining against HA. **B-B3.** Expression of GFP-HA fused to *CG2774* 3'UTR monitored by antibody staining against HA. The 3'UTRs are indicated on top of each panel. No HA staining is observed in germ plasm or germ cells. Note lack of expression in stage 14 gonads (A3, B3) **A'-A3', B'-B3'**. VASA in green marks germ cell development. All embryos are oriented posterior to right.

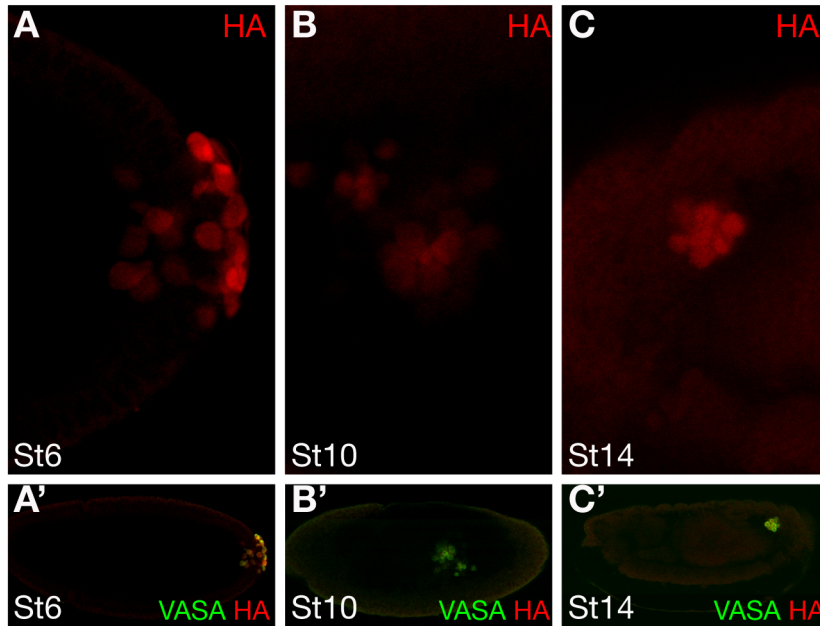

**Figure S7: Expression of *pgc* reporter construct persists beyond endogenous protein expression.**

GFP-HA expression in embryos from females carrying the *pnos::HA-GFP-HA-pgc* 3'UTR monitored by antibody staining against HA. HA staining is in red and VASA in green. The reporter expression can be detected in the gonad while endogenous protein expression is only observed during stage 4-5 [7]. **A-A'**. HA staining at stage 6 of embryogenesis. **B-B'**. HA staining at stage 11 of embryogenesis. **C-C'**. HA staining at stage 14 of embryogenesis showing reporter persists beyond endogenous protein expression. All embryos are oriented posterior to the right.

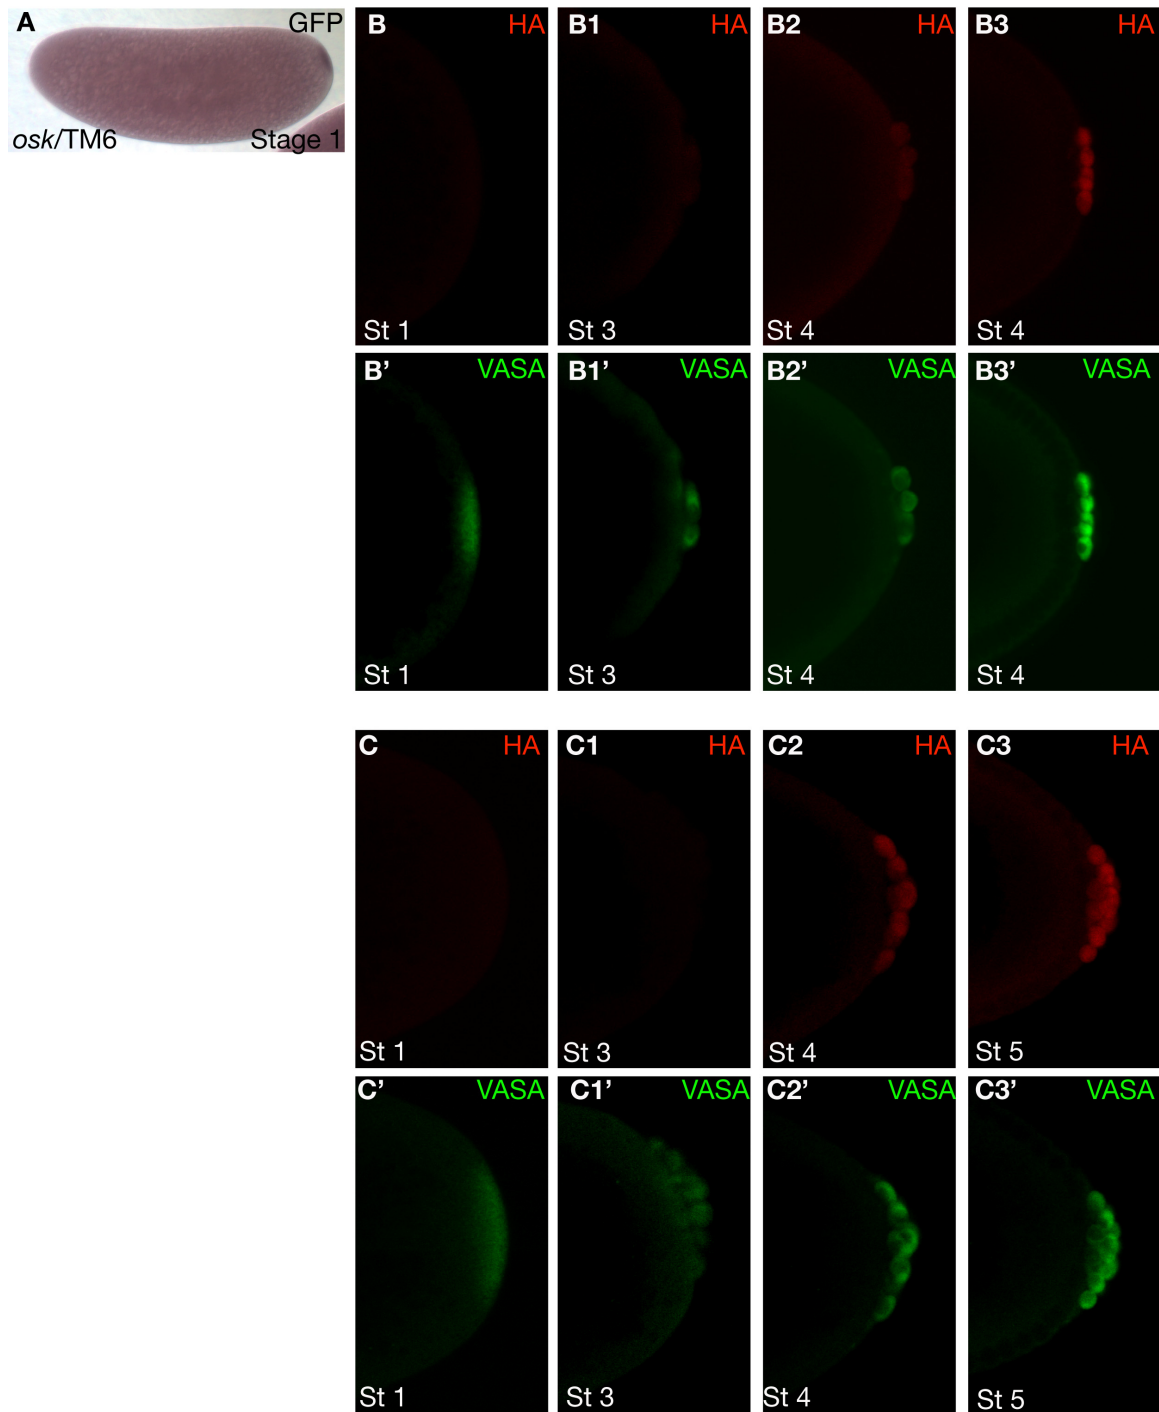

**Figure S8: Timing of expression of *pgc* reporter construct is not affected by RNA levels.**

**A.** *In situ* hybridization for GFP RNA to detect *HA-GFP-HA-pgc* 3'UTR RNA in embryo from female carrying the *pnos::HA-GFP-HA-pgc* 3'UTR transgene in *osk* heterozygous background, where only half the amount of germ plasm is present and hence less GFP-*pgc* 3'UTR RNA is localized compared to wild type (see Figure 1). **B-B3.** GFP-HA translation in embryos from females carrying the *pnos::HA-GFP-HA-pgc* 3'UTR transgene in *osk* heterozygous background. **B'-B3'.** VASA in green marks various stages

**Current Biology, Volume 19**

of germ cell development. Reduction in levels of localized RNAs does not affect timing of translation. **C-C3**. Reduction in copy number of *pnos::HA-GFP-HA-pgc* 3'UTR transgene does not affect timing of translation. Embryos with one copy of *pnos::HA-GFP-HA-pgc* 3'UTR transgene stained for HA. **C1'-C3'**. VASA in green, marks various stages of germ cell development. All embryos are oriented posterior to the right.

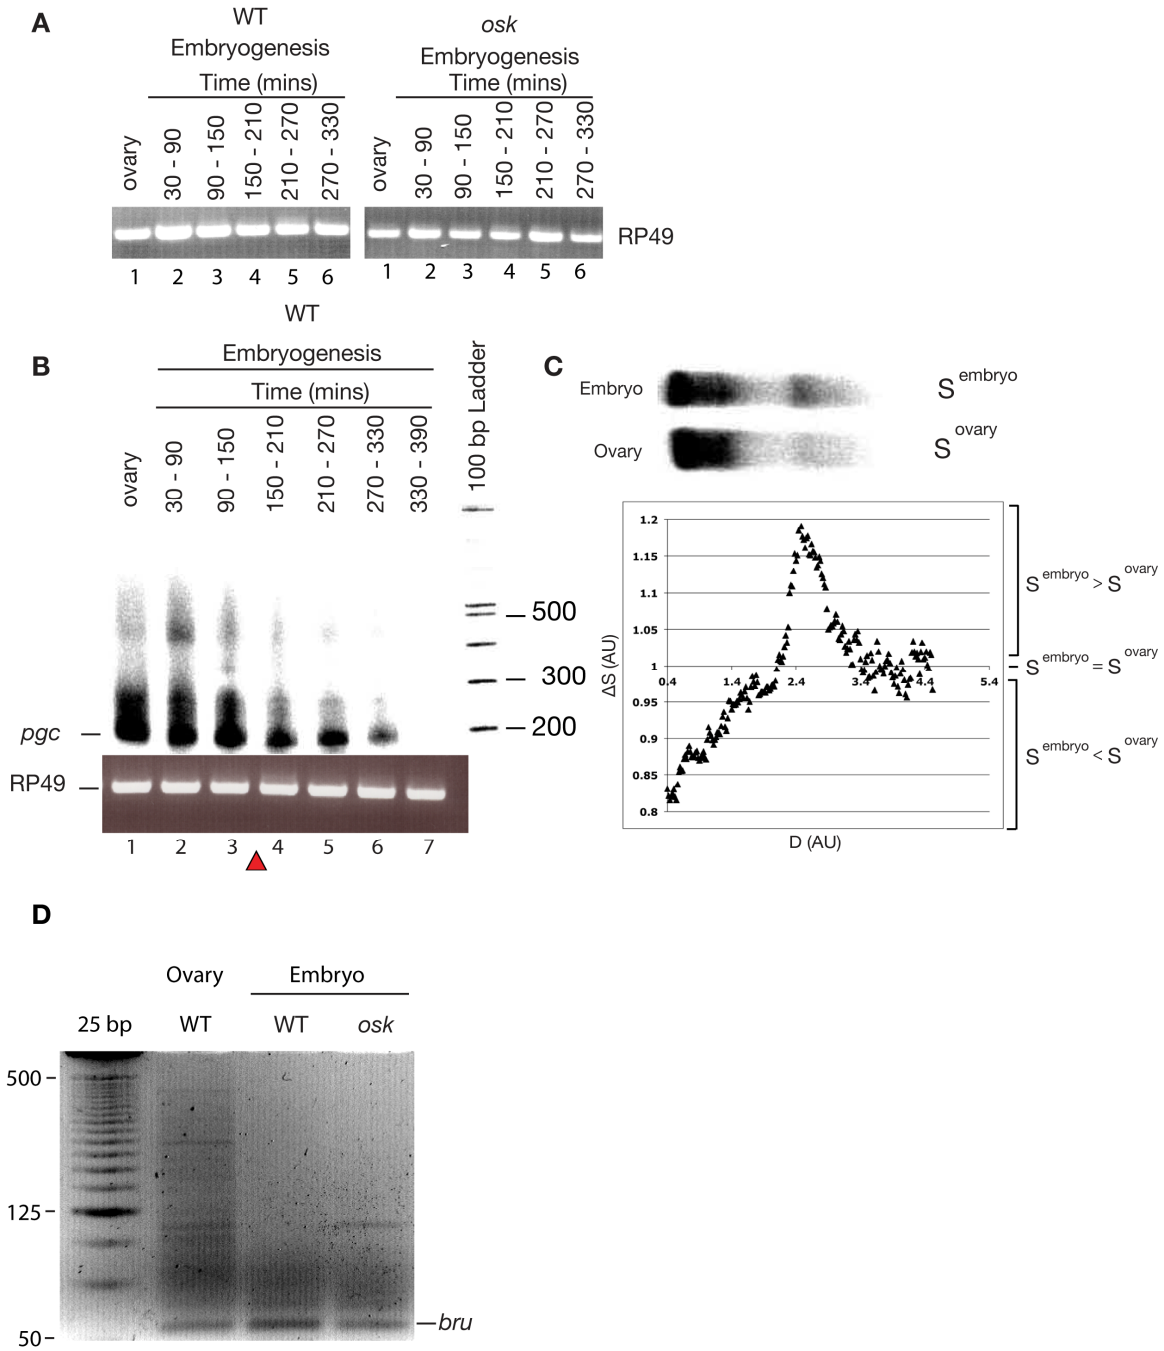

**Figure S9: Poly(A) tail extension is germ plasm dependent.**

**A.** RP49 control for PAT test of wild-type and *osk* mutant embryo extracts shown in Fig2A. **B.** Poly(A) tail length (PAT) analysis of *pgc* RNA. PAT assay was performed for *pgc* RNA as indicated in materials and methods and products were run on a denaturing acrylamide gel. Lane 1: Ovary; Lane 2: 30-90 mins (stage 1-3); Lane 3: 90-150 mins (stage 3-4); Lane 4: 150-210 mins (stage 4-5); Lane 5: 210-270 mins (stage 5-7); Lane 6: 270-330 mins (stage 8-10); Lane 7: 330-390 mins (stage 11). Red triangles mark maternal to zygotic transition during which unlocalized RNAs are degraded, Line

indicates baseline for non-adenylated RNA. **C.** Poly (A) tail length in the ovary ( $S^{\text{ovary}}$ ) and embryo ( $S^{\text{embryo}}$ ) was quantified as described in materials and methods. The fractional change in poly (A) tail length ( $\Delta S = S^{\text{embryo}} / S^{\text{ovary}}$ ) was plotted as a function of distance (D) from the main baseline band. Quantitation of signal in these lanes shows an increase in poly(A) tail length during embryogenesis. **D.** Bruno, a class IV RNA, shows a long poly(A) tail during oogenesis but not during embryogenesis. *Bruno* poly(A) tail length was measured using cRT-PCR as described in materials and methods. Bruno has a long Poly(A) tail of about 350nts during oogenesis. During embryogenesis the poly(A) tail is short  $\sim 75$ nt in embryos from *osk* and wild-type females.

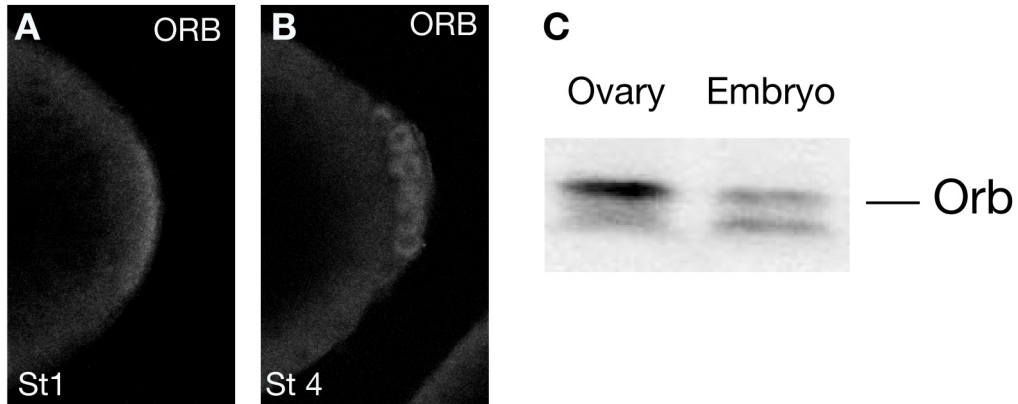

**Figure S10: Translation of *pgc* is CPEB independent.**

**A, B.** ORB staining in germ plasm and germ cells respectively. **C.** Western blot of ovary and embryo extracts probed with ORB antibody shows the presence of ORB protein during oogenesis and embryogenesis respectively.



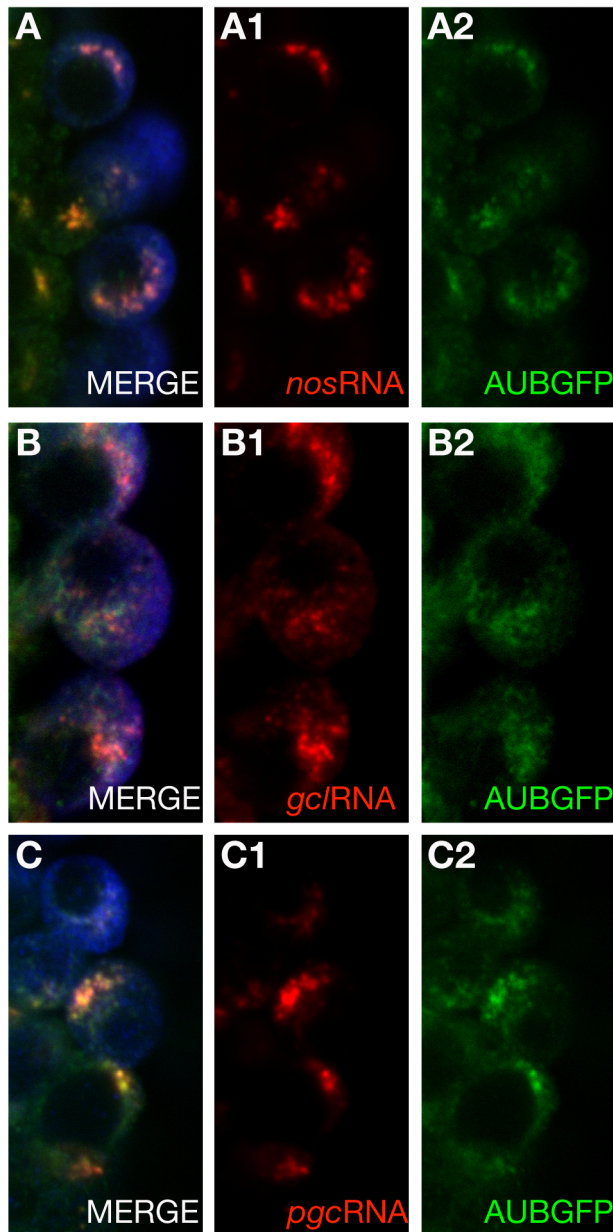

**Figure S11: Polar granules coordinate germ plasm RNAs:**

Embryos were stained for VASA (blue) to identify germ cells and Aubergine-GFP (green) to mark polar granules. *In situ* hybridization for *nanos*, *gcl* and *pgc* RNAs were carried out to determine association of these RNAs with polar granules at stage 5. **A-A2:** *nanos* RNA (red) colocalizes with polar granules (green) at stage 5. **B-B2:** *In situ* hybridization with *gcl* RNA probe (red) showing colocalization with polar granules (green). **C-C2:** *In situ* hybridization with *pgc* RNA probe (red) showing colocalization with polar granules (green). All embryos are oriented posterior to the right.

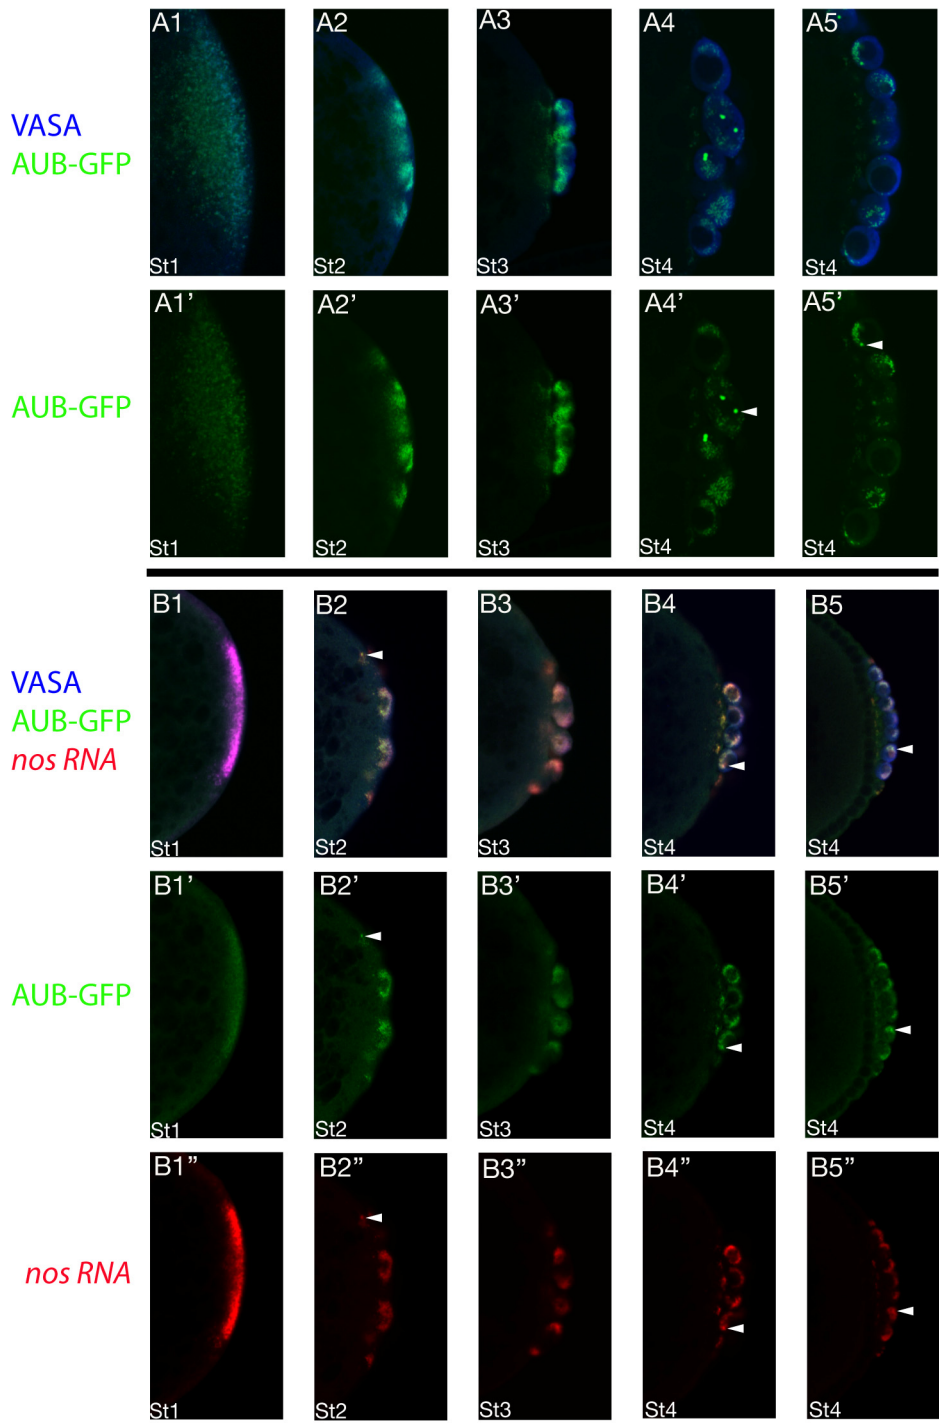

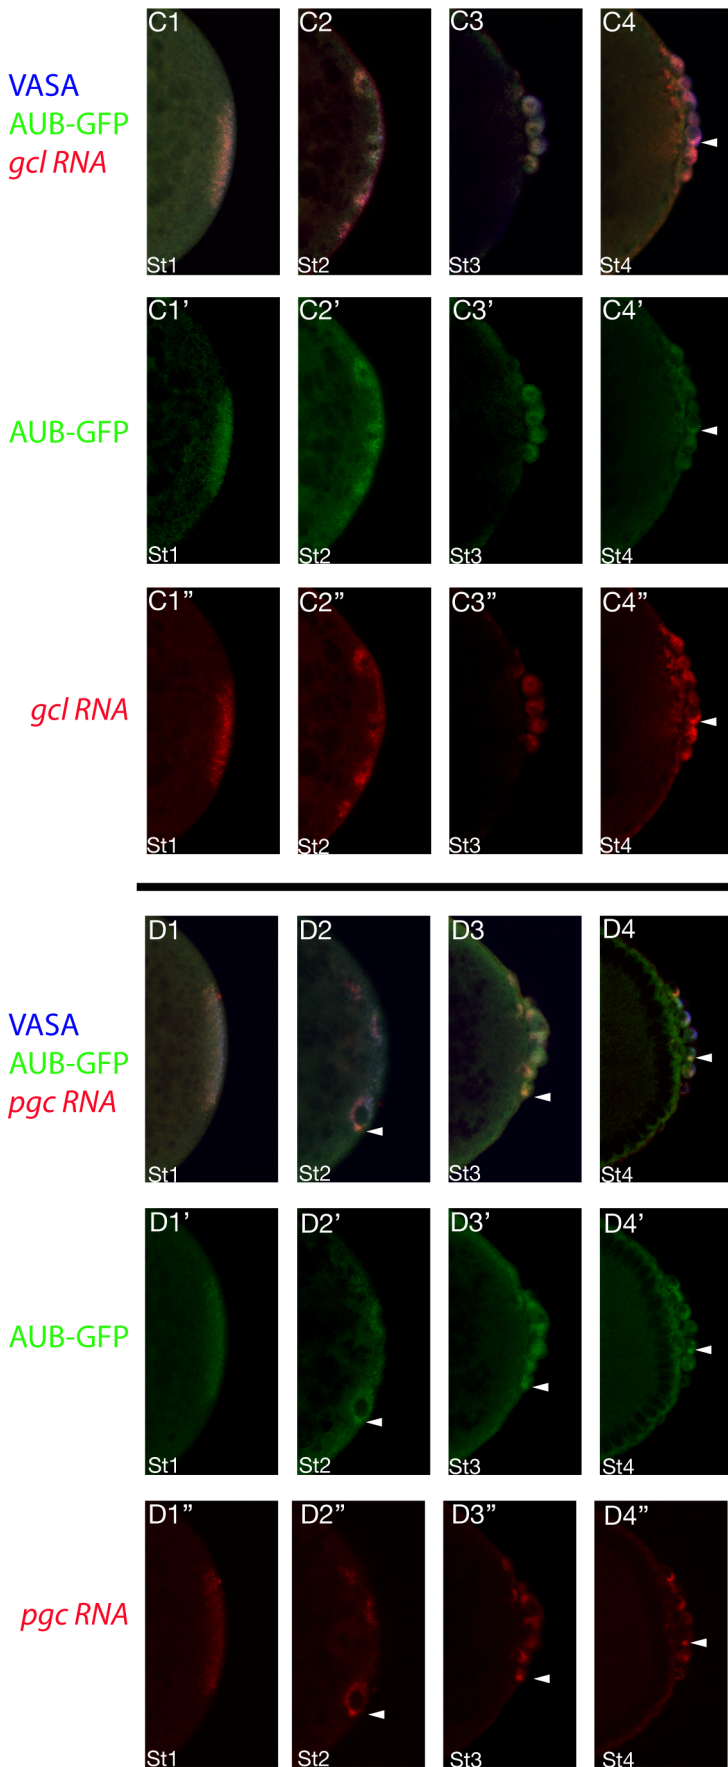

**Figure S12: Polar granules are continuously associated with germ plasm RNAs.**

Embryos were stained for VASA (blue) to identify germ cells and Aubergine-GFP (green) to mark polar granules. **A1-A5**: Merge of VASA and AUB-GFP channels showing polar granules as a function of time. The granules become bigger and more prominent at stage 4-5 [8]. **A1'-A5'**: AUB-GFP channel showing polar granules alone. White arrowheads point to polar granules. **B1-B5**: Merge of VASA (blue), AUB-GFP (green), *nanos* RNA *in situ* hybridization (red). *In situ* hybridization for *nanos* was carried out to determine association of *nanos* RNA with polar granules as function of time. *nanos* RNA colocalizes with polar granules from germ plasm to germ cell stage. **B1'-B5'**, **B1''-B5''**: AUB-GFP and *nanos* RNA channels respectively. Similar experiments were carried out with *gcl* RNA (**C1-C5**) and *pgc* RNA (**D1-D5**), respectively. All embryos are oriented posterior to the right.

## Supplementary Table 1

| <b>No.</b> | <b>CG Name</b> | <b>Gene Name</b>                         |
|------------|----------------|------------------------------------------|
| 1          | CG10076        | spire (spir)                             |
| 2          | CG10077        | CG10077                                  |
| 3          | CG10192        | Off Schedule                             |
| 4          | CG10868        | oo18 RNA Binding Protein (ORB)           |
| 5          | CG10901        | Oskar (OSK)                              |
| 6          | CG10954        | Arc P34                                  |
| 7          | CG11597        | CG11597                                  |
| 8          | CG1308         | CG1308                                   |
| 9          | CG13933        | CG13933                                  |
| 10         | CG14025        | Blastoderm-specific gene 25D (Bsg25D)    |
| 11         | CG14066        | La Related Protein (LARP)                |
| 12         | CG14217        | Tao1                                     |
| 13         | CG14814        | CG14814                                  |
| 14         | CG17678        | Concertina (CTA)                         |
| 15         | CG1838         | Myoglianin                               |
| 16         | CG18446        | CG18446                                  |
| 17         | CG2677         | eIF2B Beta                               |
| 18         | CG2699         | Pi3K21B                                  |
| 19         | CG2774         | CG2774                                   |
| 20         | CG2865         | CG2865                                   |
| 21         | CG2941         | CG2941                                   |
| 22         | CG3171         | Trapped in Endoderm 1 (TRE1)             |
| 23         | CG31762        | Arrest (ARET)                            |
| 24         | CG31998        | CG31998                                  |
| 25         | CG32756        | CG32756                                  |
| 26         | CG3325         | Spindle B (SPNB)                         |
| 27         | CG33529        | Rapgap1                                  |
| 28         | CG3727         | Dreadlocks (DOCK)                        |
| 29         | CG4040         | CG4040                                   |
| 30         | CG4294         | CG4294                                   |
| 31         | CG4427         | cabut (cbt)                              |
| 32         | CG4710         | smell impaired 21F (smi21F)              |
| 33         | CG4735         | Shutdown (SHU)                           |
| 34         | CG4755         | RhoGAP92B                                |
| 35         | CG4903         | Misexpression Suppressor of Ras4 (MESR4) |
| 36         | CG5292         | CG5292                                   |
| 37         | CG5303         | meiotic from via Salaria 332 (mei-S332)  |
| 38         | CG5637         | Nanos (NOS)                              |
| 39         | CG6017         | CG6017                                   |
| 40         | CG6072         | Sarah (SRA)                              |
| 41         | CG6418         | CG6418                                   |
| 42         | CG6509         | CG6509                                   |
| 43         | CG6721         | GTPase Activating Protein 1 (GAP1)       |
| 44         | CG6783         | CG6783                                   |
| 45         | CG6805         | CG6805                                   |
| 46         | CG7015         | Upstream of N-Ras (UNR)                  |

|    |         |                      |
|----|---------|----------------------|
| 47 | CG7184  | Makorin 1 (MKRN1)    |
| 48 | CG7533  | charybde (chrb)      |
| 49 | CG7719  | greatwall (gwl)      |
| 50 | CG8104  | nudE                 |
| 51 | CG8114  | Pebble (PBL)         |
| 52 | CG8411  | germ cell-less (gcl) |
| 53 | CG8994  | exuperantia (exu)    |
| 54 | CG9252  | Deadlock (DEL)       |
| 55 | CG9699  | CG9699               |
| 56 | CG9755  | Pumilio (PUM)        |
| 57 | CG9821  | CG9821               |
| 58 | CG32885 | pgc                  |

**Table S1: List of RNAs localized to the germ plasm.**

We assembled a list of RNAs localized to germ plasm based on the expression patterns of RNAs described by Lecuyer *et al.* [9], the Berkeley Drosophila Genome Project RNA expression, Tomancak *et al.* [10] and literature searches. Criterion for inclusion in this list was a pattern of localization similar to that described for *nanos*, *gcl* and *pgc*: “Localized RNAs” are maternally synthesized and become localized in a crescent at the posterior pole of the early embryo (stage 1-2), once nuclei enter the germ plasm these RNAs form characteristic “RNA islands” around the nuclei at stage 3, and the RNAs are incorporated into developing germ cells at stage 4 [9]. Localized RNAs can persist in germ cells until late stages of embryogenesis, while maternal RNA not incorporated into germ cells is degraded during the maternal to zygotic transition of gene expression (stage 4-5). The RNAs in this table were included based on published reports (see above). In contrast to the eleven RNAs analyzed in this study, localization patterns were not confirmed by RNA *in situ* hybridizations.

**Supplementary Table 2**

| <b>No.</b> | <b>CG Name</b> | <b>Gene Name</b>                                   |
|------------|----------------|----------------------------------------------------|
| 1          | CG10050        | CG10050                                            |
| 2          | CG10120        | Malic enzyme (men)                                 |
| 3          | CG10215        | Ercc1                                              |
| 4          | CG10360        | refractory to sigma P (ref(2)p)                    |
| 5          | CG10462        | CG10462                                            |
| 6          | CG10520        | Tube (TUB)                                         |
| 7          | CG10701        | Moesin (MOE)                                       |
| 8          | CG10811        | Eukaryotic Translation Initiation Factor 4G(eIF4G) |
| 9          | CG10895        | loki (lok)                                         |
| 10         | CG10981        | CG10981                                            |
| 11         | CG11181        | Cup                                                |
| 12         | CG11254        | Maelstrom (MAEL)                                   |
| 13         | CG11372        | Galectin                                           |
| 14         | CG11513        | Armitage (ARMI)                                    |
| 15         | CG11793        | Superoxide Dismutase (SOD)                         |
| 16         | CG11987        | tango (tgo)                                        |
| 17         | CG11992        | Relish (REL)                                       |
| 18         | CG12055        | Glyceraldehyde 3 Phosphate Dehydrogenase 1         |
| 19         | CG12084        | CG12084                                            |
| 20         | CG1242         | Heat Shock Protein 83 (HSP83)                      |
| 21         | CG12576        | diaspora                                           |
| 22         | CG1258         | Pavarotti (PAV)                                    |
| 23         | CG12737        | Calmodulin Binding Protein (CRAG)                  |
| 24         | CG12819        | Slender Lobes (SLE)                                |
| 25         | CG13344        | CG13344                                            |
| 26         | CG13349        | CG13349                                            |
| 27         | CG13777        | Milton (MILT)                                      |
| 28         | CG1417         | Sluggish A (SLGA)                                  |
| 29         | CG14226        | Domeless (DOME)                                    |
| 30         | CG14489        | Olf186M                                            |
| 31         | CG14648        | Growl                                              |
| 32         | CG14712        | CG14712                                            |
| 33         | CG1489         | Pros45                                             |
| 34         | CG15737        | CG15737                                            |
| 35         | CG1578         | CG1578                                             |
| 36         | CG1633         | Thioredoxin Peroxidase 1 (JAFRAC1)                 |
| 37         | CG1691         | IGF2 mRNA Binding Protein (IMP)                    |
| 38         | CG17161        | Grapes (GRP)                                       |
| 39         | CG1721         | Phosphoglyceromutase (PGLYM78)                     |
| 40         | CG17270        | CG17270                                            |
| 41         | CG17658        | CG17658                                            |
| 42         | CG1780         | Imaginal Disc Growth Factor 4 (IDGF4)              |
| 43         | CG17870        | 14-3-3 Zeta                                        |
| 44         | CG1793         | Mediator Complex Subunit 26 (MED26)                |
| 45         | CG17960        | RhoGAP1A                                           |
| 46         | CG1812         | CG1812                                             |



|    |         |                                           |
|----|---------|-------------------------------------------|
| 47 | CG1962  | CG1962                                    |
| 48 | CG2009  | bip2                                      |
| 49 | CG2041  | legless (LGS)                             |
| 50 | CG3068  | Aurora (AUR)                              |
| 51 | CG31137 | Twin                                      |
| 52 | CG31156 | CG31156                                   |
| 53 | CG3157  | gamma Tubulin at 23C (gammaTub23C)        |
| 54 | CG3183  | Geminin                                   |
| 55 | CG32243 | CG32243                                   |
| 56 | CG32473 | CG32473                                   |
| 57 | CG32616 | Stellate 2D Orphon                        |
| 58 | CG3273  | Scrambled (SCED)                          |
| 59 | CG3278  | Tif-IA                                    |
| 60 | CG33166 | Stem Cell Tumor (STET)                    |
| 61 | CG34100 | Molting Defective (MLD)                   |
| 62 | CG3506  | Vasa (VAS)                                |
| 63 | CG3509  | CG3509                                    |
| 64 | CG3510  | Cyclin B (CYCB)                           |
| 65 | CG4035  | Eukaryotic Initiation Factor 4E (eIF4E)   |
| 66 | CG4063  | ebi                                       |
| 67 | CG4183  | Heat Shock Protein 26 (HSP26)             |
| 68 | CG4193  | Deadhead (DHD)                            |
| 69 | CG4466  | Heat Shock Protein 27 (HSP27)             |
| 70 | CG4581  | Thiolase                                  |
| 71 | CG4799  | Pendulin (PEN)                            |
| 72 | CG4898  | Tropomyosin 1 (TM1)                       |
| 73 | CG4911  | CG4911                                    |
| 74 | CG4944  | Ciboulot (CIB)                            |
| 75 | CG5026  | CG5026                                    |
| 76 | CG5692  | Rapsynoid (RAPS)                          |
| 77 | CG5753  | Staufen (STAU)                            |
| 78 | CG6433  | Quail (QUA)                               |
| 79 | CG6500  | Beadex (BX)                               |
| 80 | CG6543  | CG6543                                    |
| 81 | CG6605  | Bicaudal D (BicD)                         |
| 82 | CG6667  | Dorsal (DL)                               |
| 83 | CG6875  | Abnormal Spindle (ASP)                    |
| 84 | CG6906  | Carbonic Anhydrase 2 (CAH2)               |
| 85 | CG6967  | CG6967                                    |
| 86 | CG7070  | Pyruvate kinase (PyK)                     |
| 87 | CG7271  | CG7271                                    |
| 88 | CG7369  | CG7369                                    |
| 89 | CG7413  | Retinoblastoma-family protein (Rbf)       |
| 90 | CG7660  | peroxinectin, pxt                         |
| 91 | CG7869  | Suppressor of Under Replication (SuUR)    |
| 92 | CG7935  | Moleskin (MSK)                            |
| 93 | CG8042  | CG8042                                    |
| 94 | CG8231  | TCP1 Zeta (TCP1Zeta)                      |
| 95 | CG8418  | Ras which interacts with Calmodulin (Ric) |

|     |        |                                 |
|-----|--------|---------------------------------|
| 96  | CG8439 | T-complex Chaperonin 5 (CCT5)   |
| 97  | CG8440 | Lissencephaly1 (LIS1)           |
| 98  | CG8507 | CG8507                          |
| 99  | CG8571 | Smallminded (SMID)              |
| 100 | CG8632 | CG8632                          |
| 101 | CG8668 | CG8668                          |
| 102 | CG8915 | CG8915                          |
| 103 | CG8977 | Cct gamma (CCTgamma)            |
| 104 | CG9028 | Short Spindle 2 (SSP2)          |
| 105 | CG9057 | Lipid storage droplet-2 (Lsd-2) |
| 106 | CG9078 | infertile crescent (ifc)        |
| 107 | CG9748 | Belle (BEL)                     |
| 108 | CG9916 | Cyclophilin1 (CYP1)             |
| 109 | CG9925 | CG9925                          |
| 110 | CG9984 | TH1                             |
| 111 | Indora | Indora (IDR)                    |
| 113 | CG6122 | Piwi                            |

**Table S2: List of RNAs protected in germ cells.**

We assembled this list of protected RNAs based on the expression pattern of previously known RNAs that are protected in the germ cells such as *hsp 83*. Protected RNAs are not localized to the germ plasm as described for localized RNAs in Supplementary Table 1. Protected RNAs are maternally synthesized; a fraction of the RNA becomes incorporated into developing germ cells and can persist in germ cells until late stages of embryogenesis, while maternal RNA not incorporated into germ cells is degraded during the maternal to zygotic transition of gene expression (stage 4-5). The distribution patterns of RNAs listed in this table were not confirmed by RNA *in situ* hybridizations and are based on the expression patterns of RNAs described by Lecuyer *et al.* [9], the Berkeley Drosophila Genome Project RNA expression, Tomancak *et al.* [10] and literature searches.
